# Supplementary material
Source: Research Square preprint supplement (doi:10.21203/rs.3.rs-10219884/v1)
Supplement: Supplementary file 1 [file 85dba72a0e1319c53f82a1cf.docx]

**ADDITIONAL MATERIALS**

**Additional Material 1: Semi-structured interview guide**.

Initial question based on a SWOT analysis (strengths, weaknesses, opportunities, and threats)

- Initial question based on a SWOT analysis (strengths, weaknesses, opportunities, and threats) and Considering OSI Araba’s current model for providing care to individuals and families in need of palliative care (NCP) at home (the support team model), what opportunities/threats and weaknesses/strengths do you identify?
- For Focus (if necessary)

o Describe any difficulties you may face in your day-to-day work when caring for individuals and families in need of palliative care (NCP).

o Based on the above, what needs would you highlight as a healthcare professional and as part of a healthcare team when caring for this population group?

o What aspects do you consider key to moving toward more comprehensive care for this group?

o Do you have any suggestions that could help coordinate the various hospital, primary care, and social-healthcare resources?

o Regarding the structure and content of the rotation for family and community medicine and nursing residents with the Palliative Medicine Service at OSI Araba, what areas for improvement do you identify? (This question should be asked in the group of residents and in the other two groups, if there are preceptors.)

**Additional Material 2: Themes, Subthemes and Illustrative Quotes**

| **Themes** | **Sub-themes** | **Illustrative Quotes in Spanish (Original)** | **Illustrative Quotes: English translation** using DeepL AI. |
| --- | --- | --- | --- |
| **CATEGORY A: FACILITATORS OF PRIMARY PALLIATIVE CARE** | | | |
| 1. **Palliative Care Community Team (ESAP)** | - Consultation Support - Access to, close support, proximity and coordination - Interprofessional | *"La respuesta temprana a la interconsulta para prestar soporte o asesoramiento a su equipo de AP"*  *"La rapidez de respuesta"*  *"Es una atención cercana y eficaz"*  *"La disponibilidad y profesionalidad de los integrantes"* | *“The prompt response to the inter-consultation request to provide support or advice to their primary care team”.*  *“The speed of response”*  *“It's personalized and effective care”*  *“The availability and professionalism of the team members”* |
| 1. **Collaboration** | - Primary care professionals feel respected - Joint decision-making - Consultation support provided by ESAP or Hospital-at-Home Team - Monthly case meetings - Joint visits - Follow up visits - Virtual consultations | *"Me ha resultado positivo no la consulta, o que funcionasen como equipo de soporte, sino cuando vinieron a ver al paciente, y nos hicimos conjuntamente cargo del paciente".*  *“Contar con profesionales especializados para la toma de decisiones más difíciles, para temas de medicación, tratamiento".*  *“En Hospitalización a Domicilio no hay ninguna posibilidad de coordinación ni contacto con AP. Ellos suplen todo y no dejan entrar a la AP, cosa que no ocurre con la unidad de paliativos…"* | *“What I found most helpful wasn’t the consultation itself, or the fact that they acted as a support team, but rather when they came to see the patient, and we took care of the patient together.”*  *“Having specialized professionals available to help with the most difficult decisions—regarding medication and treatment.”*  *“With Home Hospitalization, there’s no possibility of coordination or contact with primary care. They handle everything and don’t let primary care in, which isn’t the case with the palliative care unit…”* |
| 1. **Education and training** | - Palliative training and competencies of the primary care teams | *"Creo que los equipos de AP cada vez están más formados tanto por experiencia como por casos anteriores que se han coordinado con la unidad de paliativos y la formación online de los jueves paliativos".*  *GP_E1* “*De cuando nació el equipo de paliativos, ahora hay muchos profesionales que ya no nos necesitan porque han aprendido. Y dices, y eso es un éxito. Cuando ves que igual empieza a haber menos domicilios es que igual hay gente que se ha capacitado.*” | *“I think palliative care teams are becoming increasingly well-trained, both through experience and through previous cases they’ve coordinated with the palliative care unit, as well as through the online training sessions on Palliative Care Thursdays.”*  *GP_E1 “Since the palliative care team was first established, there are now many professionals who no longer need us because they’ve learned. And you realize that’s a success. When you see that the number of home visits is starting to decrease, it means that people have been trained.”* |
| 1. **Supports for patients** |  | *"Los pacientes se sienten muy respaldados además del equipo de AP con el de paliativos".*  *"En caso de que precise ingreso el paciente es un aspecto positivo (ya le conocen en el servicio)".* | *“Patients feel very supported not only by the primary care team but also by the palliative care team.”*  *“If the patient needs to be admitted, that's a positive thing (they already know him in the department).”* |
| ***CATEGOTY B: BARRIERS*** | | | |
| 1. **Workforce challenges** and **Increasing patient loads** |  | *"En ocasiones es difícil cuadrar horarios para coincidir por las agendas que tenemos".*  *"la complejidad va creciendo a medida que se aproxima el fin de vida; y, con mucha frecuencia, la atención a estos pacientes en la etapa final en domicilio se queda muy corta por falta de capacidad (tiempos, ausencia de personal no sustituida) y limitación de lunes a viernes de los equipos de primaria".*  *GP_E3: “Pero muchas veces yo veo la dificultad, es; hazte cargo de él porque no podemos. Pero nosotros, no podemos hacernos cargo de todos, ... Se hace uno cargo en cosas ya muy específicas, muy puntuales y que va a ser poco tiempo. No tenemos... tampoco recurso.”* | *“Sometimes it’s hard to coordinate schedules to meet because of our busy calendars.”*  *“The complexity increases as the end of life approaches; and, very often, care for these patients in the final stages at home falls far short due to a lack of capacity (time constraints, unfilled staff absences) and the Monday-through-Friday limitations of primary care teams.”*  *GP_E3: “But often I see the difficulty: ‘Take care of him because we can’t.’ But we can’t take care of everyone… We take on responsibility for very specific, one-off situations that will only last a short time. We don’t have… the resources either.”* |
| 1. **Ensuring continuity of care on the long term** |  | *"Para mí, hay un problema de continuidad asistencial………sobre todo durante las noches y los fines de semana y festivos".*  *"… la situación actual de la AP no permite disponer de unos médicos de familia con contratos estables/medianamente largos que permitan seguir bien al paciente; se ha dado el caso de tener a un paciente paliativo empeorado; tener nuevo médico, cupos sin médicos...."* | *“For me, there is a problem with continuity of care…especially at night, on weekends, and on holidays.”*  *“…the current situation in primary care does not allow for family doctors with stable or moderately long-term contracts that would enable them to properly follow up with patients; there have been cases where a palliative care patient’s condition has worsened, where there is a new doctor or where patient quotas are not being filled by doctors....”* |
| 1. **Gaps in knowledge about ESAP service** |  | *"La rotación de profesionales hace que no se conozca la existencia del servicio de soporte".*  *"Desconocimiento de en qué casos se puede consultar".* | *“Staff turnover means that people are unaware of the support service.”*  *“Lack of awareness about when to seek assistance.”* |
| **CATEGORY C: IMPROVEMENT IDEAS** | | | |
| 1. **Coordination** | - More communication and coordination between teams. - Teams knowing each other (mutual knowledge) | *“…poder hacer pequeñas reuniones para comentar el caso (con los medios que tenemos ahora incluso podría ser telemáticamente)".*  *"Se podrían programar coordinaciones telefónicas seriadas con los médicos (cada mes, cada 15 días... según el caso)".*  **GF1, EAP3:** *“como área de mejoras, sí que podría ser explicar el modelo bien, porque igual hay cosas que no entendemos porque no sabemos cómo funciona…”* | *“…to hold small meetings to discuss the case (with the resources we have now, it could even be done remotely).”*  *“We could schedule regular conference calls with the doctors (every month, every 15 days… depending on the case).”*  *GF1, EAP3: “As for areas for improvement, it would definitely help to explain the model clearly, because there are still things we don’t understand since we don’t know how it works…”* |
| 1. **Model of Care** | - Varying opinions (consultation model as is, versus more shared care, versus more takeover by palliative or hospital-in-the home - More continuity of care | *"Creo que podría intentar subunidad de referencia en HDom para mayor contacto con AP".*  *"Creo que en ese caso también, siendo el paciente conocido en Paliativos, debería realizarse un seguimiento más estrecho por dicho servicio, y no ser mero apoyo a la AP en ese momento”*  **GF2, MAP1:** *“De acuerdo contigo, porque yo lo creo que necesitamos es un seguimiento compartido, no un soporte”.*  *GP-E1: “Cuando un equipo de paliativos tiene que entrar es cuando haya complejidad. Pero la complejidad la mide el propio profesional. Y hay profesionales en primaria que es complejo hablar de o poner medicaciones como es la morfina o hablar de que te vas a morir.* | *“I think we could try referring the patient to the HDom subunit for closer contact with primary care.”*  *“I think that in that case as well, since the patient is known to the palliative care team, that team should provide closer follow-up, rather than merely supporting primary care at that time.”*  *GF2, MAP1: “I agree with you, because I think what we need is shared follow-up, not just support.”*  *GP-E1: “A palliative care team should step in when there’s complexity. But the complexity is assessed by the clinician themselves. And there are primary care professionals for whom it’s difficult to discuss or prescribe medications like morphine, or to talk about the fact that a patient is going to die.”* |
| 1. **Larger ESAP team** |  | **GF1, EAP4:** *“Yo pondría más personal, sí, de Psicología, porque yo,.. después iba una vez por semana a la psicóloga y te aporta, te ayuda”.*  *"Dando la importancia que se merece a la Unidad de Medicina Paliativa. Aumentando personal del Servicio de Paliativos".* | *GF1, EAP4: “I would hire more staff—yes, from the psychology department—because I… used to go to the psychologist once a week, and it really helps you.”*  *“Giving the Palliative Care Unit the importance it deserves. Increasing the staff in the Palliative Care Service.”* |
| 1. **Palliative care training** for primary care teams |  | *"Formación continua de médicos de atención primaria e incluso que se permitan rotaciones por dicho servicio a los médicos de familia, para que realmente estemos formados adecuadamente y podamos atender a estos pacientes".*  *GP-M1:* “*las rotaciones de tutores también podrían ayudar. O sea, retomar el que vengan una semana, Las experiencias han sido buenas.”* | *“Ongoing training for primary care physicians—and even allowing family physicians to rotate through that department—so that we are truly adequately trained and can care for these patients.”*  *GP-M1: “Rotations for mentors could also help. I mean, bringing back the practice of having them come for a week—the experiences have been positive.”* |
| 1. **Direct admissions from the community to the palliative care unit** |  | **GF2, MAP6:** *“…pues en vez de tener que mandar al paciente a urgencias, que le valorare le médico de familia y pueda solicitar un ingreso directo en la planta de paliativos….”*  *GP-M1:” …ingresos por la mañana directos se pueden hacer, eso, si hay posibilidad de camas o nos facilitan una cama, y cuando sabemos un poco qué está pasando, porque si no, es muy difícil de asumir un caso.”*  *GP-M3: “…lo que nos comprometemos y hacemos es hablar con urgencias, bajar urgencias y explicarles bien, viene fulanito, no hay que hacer análisis, solamente es buscar una cama y que suba, o no sabemos qué está pasando o hay que hacer una radiografía, eso sí que creo que es bueno para evitar pruebas intrusivas.”* | *GF2, MAP6: “…well, instead of having to send the patient to the emergency room, the family doctor could evaluate them and request a direct admission to the palliative care unit….”*  *GP-M1: “…direct admissions in the morning are possible—that is, if beds are available or they provide us with a bed, and once we have a basic understanding of what’s going on, because otherwise, it’s very difficult to take on a case.”*  *GP-M3: “…what we commit to and do is talk to the ER, go down to the ER, and explain the situation clearly: ‘So-and-so is coming in; no lab tests are needed—we just need to find a bed and have them admitted.’ Otherwise, we either don’t know what’s going on or an X-ray needs to be done. I really think that’s a good way to avoid invasive tests.”* |
| 1. **Patient expectations** |  | *“Habría que explicar a los pacientes cómo funciona el equipo de soporte cuando son derivados desde otras especialidades porque muchos piensan que funciona como hospitalización a domicilio".*  *GP_E3: “Pero es superimportante la primera visita conjunta, sobre todo, por encaminarlo y dejar muy claro, cuál va a ser, en este caso, el cometido de cada parte”.* | *“We need to explain to patients how the support team works when they are referred from other specialties, because many think it’s like being hospitalized at home.”*  *GP_E3: “But the first joint visit is extremely important, above all, to get things on track and make it very clear what, in this case, each party’s role will be.”* |

**Code;**

*(“”) extracted from the open-ended questions of the questionnaire*

*GF: focal group of Primary care*

*GP; focal group of Palliative Team*

*E: nurse*

*M: physician*
